# Supplementary material for: Increased dimensionalities of zinc–diphenic acid coordination polymers by simultaneous or subsequent addition of neutral bridging ligands
Source: Royal Society of Chemistry journal article supplement (doi:10.1039/b509746k), 2005-10-27
Supplement: b509746k.pdf [file b509746k.pdf]

## Increased dimensionalities of zinc-diphenic acid metal-organic framework compounds by simultaneous or subsequent addition of neutral bridging ligands

Pascal D. C. Dietzel, Richard Blom and Helmer Fjellvåg

**Experimental details** for the interconversion of compound **1** into compounds **2** or **3**.

**Figure S1.** Powder diffraction patterns for reaction of compound **1** with dabco.

**Figure S2.** Powder diffraction patterns for reaction of compound **1** with 4,4'-bpy.

**Figure S3.** Proposed mechanism for the changes of lattice parameters with temperature in compound **3**.

**Figure S4.** Observed powder pattern for **3** at 357°C and hypothetical patterns for the interpenetrated and non-interpenetrated structures.

**Experimental details** for the interconversion reactions:

1. Compound **1** (0.110 g, 0.34 mmol), triethylenediamine (0.038 g, 0.34 mmol), 15 mL of ethanol and 3 mL of water were put into a Teflon-lined autoclave and reacted for two days at 120°C. Filtration yielded an opaque substance with the original needle-shaped morphology of compound **1** that was identified as a mixture **1** and **2**.
2. Compound **1** (0.110 g, 0.34 mmol), triethylenediamine (0.038 g, 0.34 mmol), 15 mL of ethanol and 3 mL of water were put into a Teflon-lined autoclave and reacted for seven days at 120°C. Filtration yielded an opaque substance with the original needle-shaped morphology of compound **1** that was identified as a mixture **1** and **2**.
3. Compound **1** (0.045 g, 0.14 mmol), triethylenediamine (0.016 g, 0.14 mmol), and 15 mL of ethanol were put into a Teflon-lined autoclave and reacted for six days at 150°C. Filtration yielded a slightly grey-tinged substance which was identified as X-ray pure **2**.
4. Compound **1** (0.110 g, 0.34 mmol), 4,4'-bipyridyl (0.053 g, 0.34 mmol), 15 mL of ethanol and 3 mL of water were put into a Teflon-lined autoclave and reacted for two days at 120°C. Filtration yielded a mixture of colourless rectangular crystals of **3** and long colourless needles of **1**.
5. Compound **1** (0.110 g, 0.34 mmol), 4,4'-bipyridyl (0.053 g, 0.34 mmol), 15 mL of ethanol and 3 mL of water were put into a Teflon-lined autoclave and reacted for seven days at 120°C. Filtration yielded a mixture of colourless rectangular crystals of **3** and long colourless needles of **1**.
6. Compound **1** (0.115 g, 0.36 mmol), 4,4'-bipyridyl (0.111 g, 0.71 mmol), 15 mL of ethanol and 3 mL of water were put into a Teflon-lined autoclave and reacted for seven days at 120°C. Filtration yielded colourless rectangular crystals of **3** and very few remaining long colourless needles of **1**.

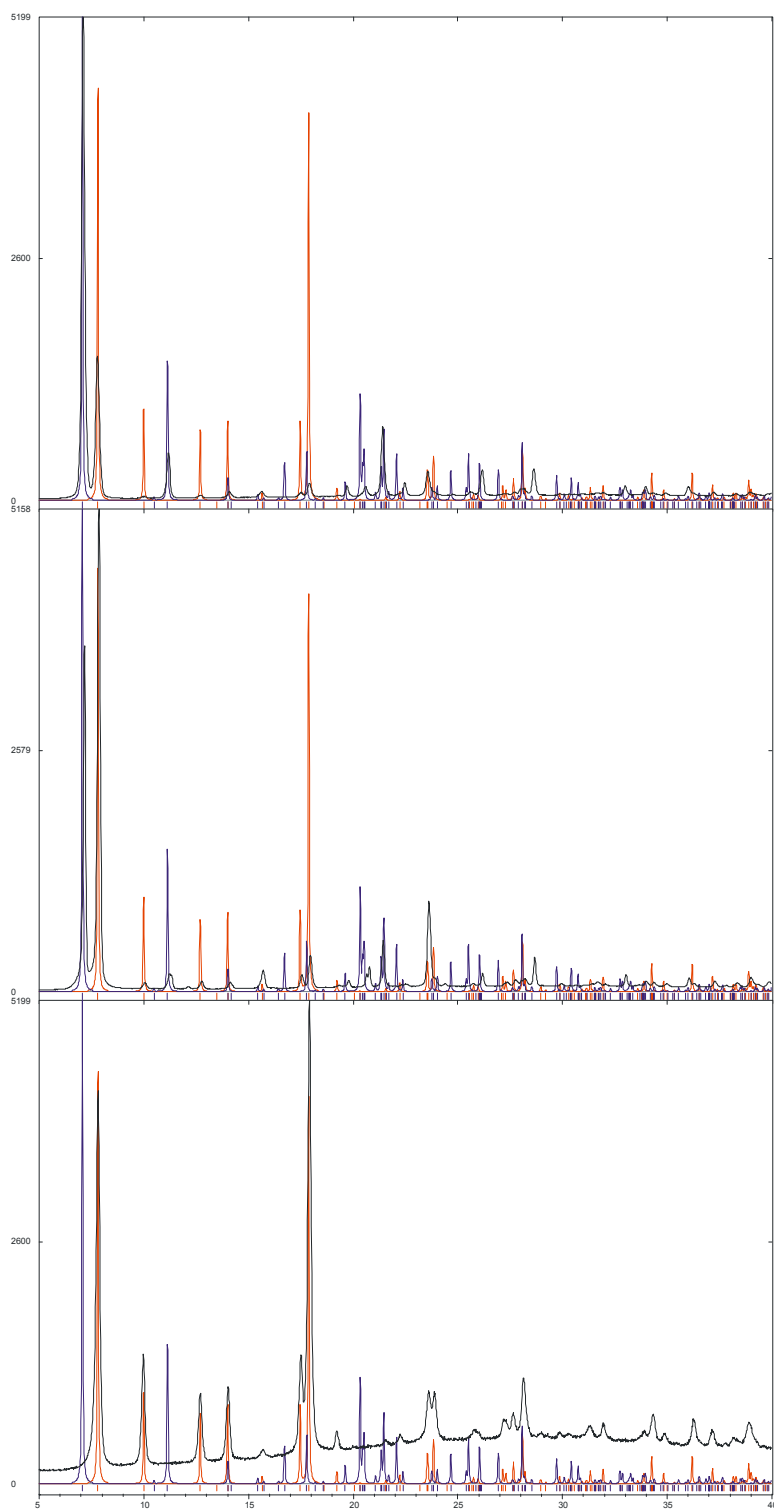

**Figure S1.** Powder diffraction patterns for reaction of compound **1** with dabco (top: after 3 d and 120°C, middle: after 7 d and 120°C, bottom: after 6 d and 150°C; blue: calculated pattern for compound **1**, red: calculated pattern for compound **2**).

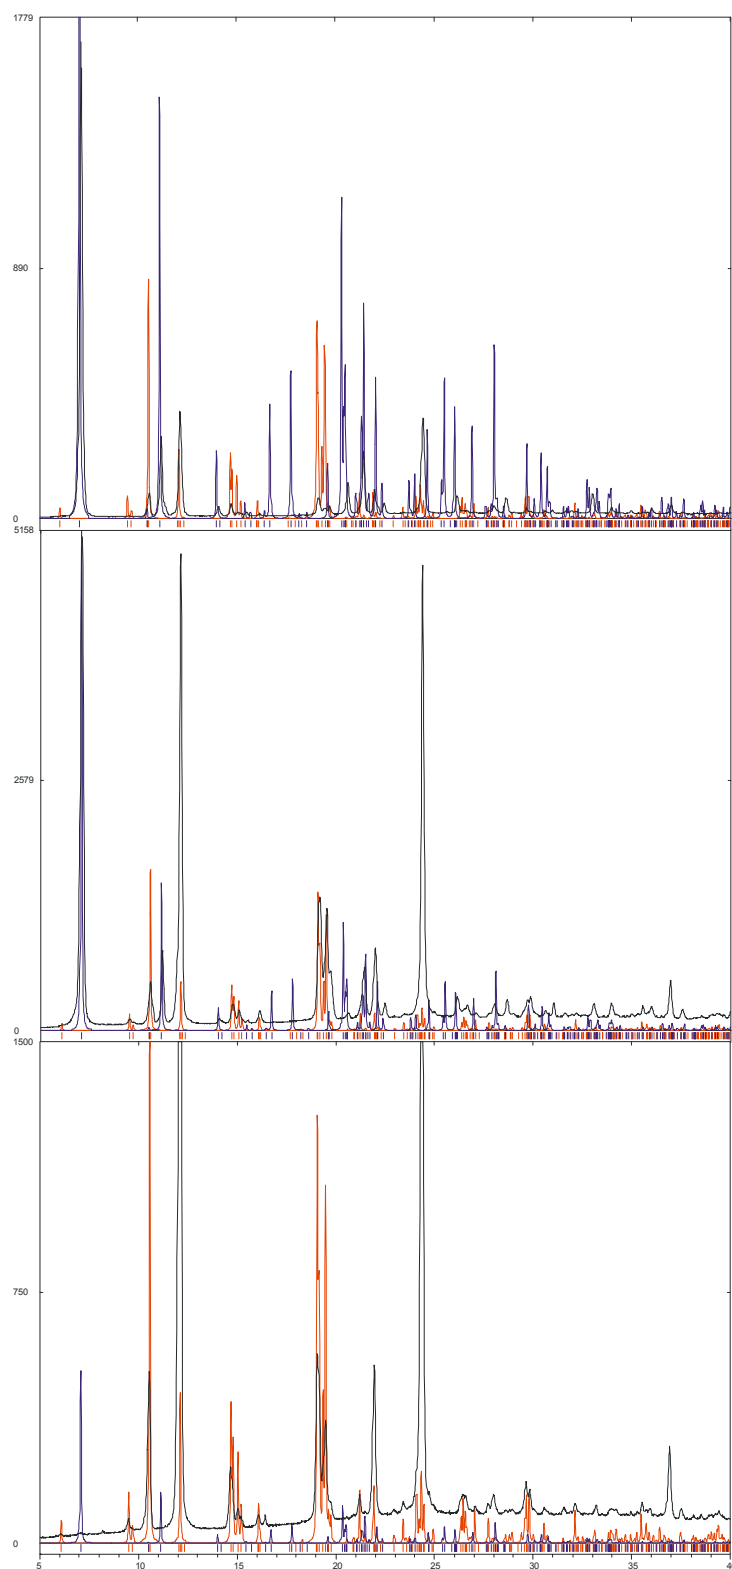

**Figure S2.** Powder diffraction patterns for reaction of compound **1** with 4,4'-bpy (top: after 2 d and 120°C, middle: after 7 d and 120°C, bottom: after 7 d and 120°C with a one-molar excess of 4,4'-bpy; blue: calculated pattern for compound **1**, red: calculated pattern for compound **3**; differences between calculated and observed intensities are due to orientational effects).

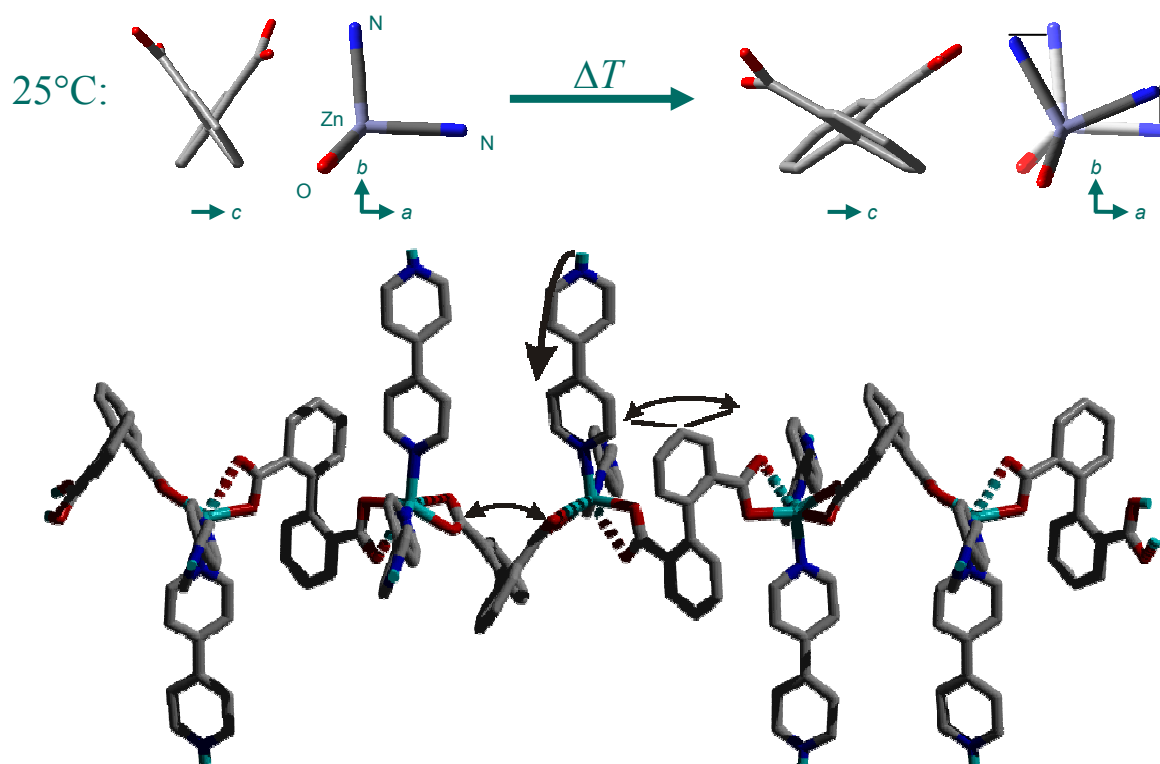

**Figure S3.** Proposed mechanism for how the widening of the angle between the planes of the aromatic rings in the 2,2'-dicarboxylatobiphenyl leads to a decrease of the  $a$  and  $b$  lattice parameters.

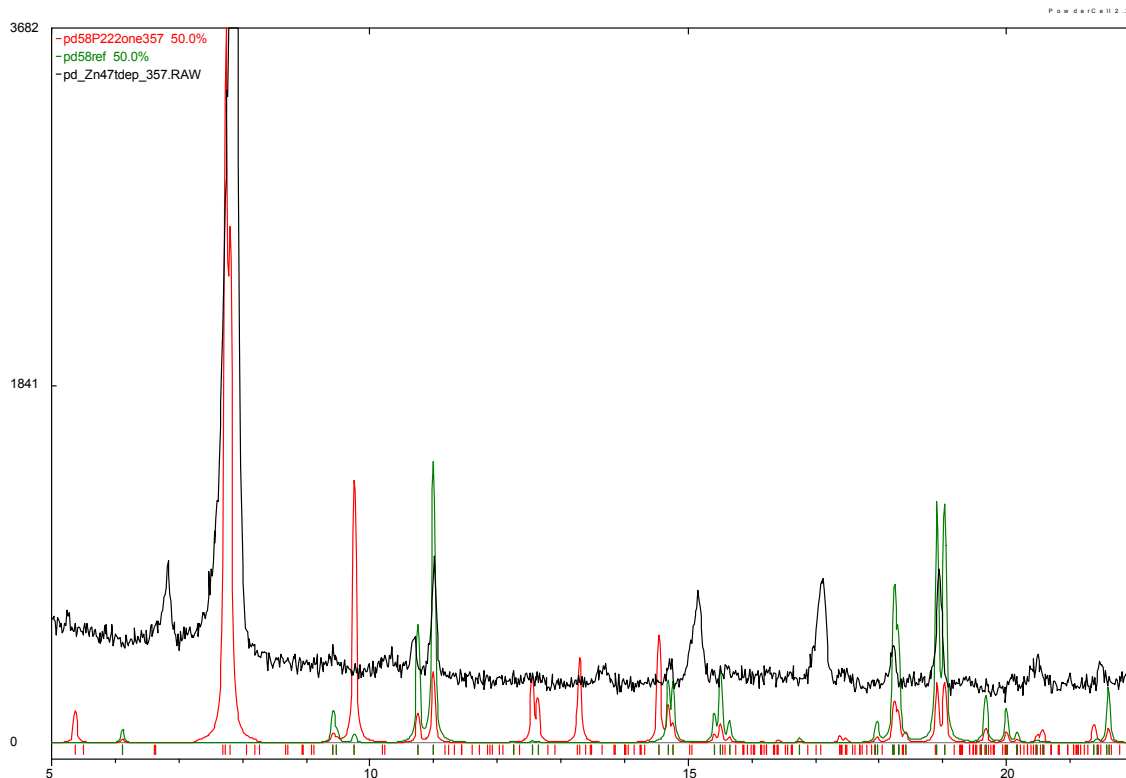

**Figure S4.** Observed powder patterns for **3** at 357°C and hypothetical patterns for the interpenetrated and non-interpenetrated structures (green: calculated pattern for the interpenetrated structure with lattice parameters adjusted for the temperature; red: calculated pattern for non-interpenetrated single network structure with the same lattice parameters).
